# Supplementary material for: Modelling the Abundances of Two Major Culicoides (Diptera: Ceratopogonidae) Species in the Niayes Area of Senegal
Source: PLoS One. 2015 Jun 29;10(6):e0131021. doi: 10.1371/journal.pone.0131021 (PMC4487250; doi:10.1371/journal.pone.0131021)
Supplement: S1 Data — (XLSX) [file pone.0131021.s001.xlsx]

## Sheet: Feuil1
site	livestock	waterbodies	date	abon_Oxystoma	T_mean	H_mean	prec_mean	ndvi	T.10.7	H.21.19	P.12.10	N.8.0
Mbao	113.58	5.06	2011-07-19	377	24.4157	70.8283	0	0.21	27.6553	75.01	0	0.222222
Mbao	113.58	5.06	2011-08-20	891	24.3513	76.61	77.7911	0.23	27.825	74.5378	0	0.213333
Mbao	113.58	5.06	2011-09-19	11482	29.4658	74.9717	1.76691	0.35	27.6727	74.5833	0	0.21
Mbao	113.58	5.06	2011-10-17	8677	29.879	72.17	8.12156	0.28	27.714	74.4811	0	0.205556
Mbao	113.58	5.06	2011-11-17	170	26.414	72.6167	0	0.28	27.898	72.5967	0	0.201111
Mbao	113.58	5.06	2011-12-18	47	25.5148	33.2817	0	0.28	27.9035	72.3261	0	0.198889
Mbao	113.58	5.06	2012-01-17	6	24.4758	50.8817	0	0.23	27.897	72.6444	0	0.193333
Mbao	113.58	5.06	2012-02-18	10	18.569	76.8783	0	0.23	27.2782	75.8217	0	0.188889
Mbao	113.58	5.06	2012-03-18	6	26.5627	40.005	0	0.2	26.3619	76.7622	0	0.191111
Mbao	113.58	5.06	2012-04-16	4	23.078	64.98	0	0.19	25.4154	75.2339	0	0.191111
Mbao	113.58	5.06	2012-05-18	298	26.8047	72.9733	0.406622	0.19	24.6159	72.455	0	0.185556
Mbao	113.58	5.06	2012-06-18	332	28.1808	72.875	0	0.15	24.4548	71.2133	0	0.183333
Niague	0	10	2011-11-29	4	24.0858	59.3296	0	0.26	30.0165	77.7908	0	0.17
Niague	0	10	2011-12-18	20	23.9038	54.7942	0	0.23	30.0449	77.0675	0	0.172222
Niague	0	10	2012-01-17	0	23.8173	57.7217	0	0.24	30.0179	75.2619	0	0.18
Niague	0	10	2012-02-18	84	18.6643	78.0117	0	0.17	29.9818	76.5303	0	0.194444
Niague	0	10	2012-03-19	19	24.229	59.7746	0	0.18	29.9972	74.0913	0	0.202222
Niague	0	10	2012-04-16	24	21.952	71.1592	0	0.19	29.8456	74.3539	0	0.223333
Niague	0	10	2012-05-18	41	25.7719	80.2146	0.546038	0.18	29.6046	73.14	0	0.237778
Niague	0	10	2012-06-18	318	27.2584	73.9821	0	0.15	29.2347	71.8326	0	0.26
Niague	0	10	2012-07-17	173	28.2203	73.4767	0.597004	0.21	28.6712	71.0957	0	0.283333
Niague	0	10	2012-08-15	10	28.8072	80.1746	1.67208	0.25	28.3546	72.221	0	0.3
Niague	0	10	2012-09-20	121	29.9193	75.3479	0	0.35	28.4924	73.3554	0	0.312222
Niague	0	10	2012-10-17	36	30.0659	73.8296	0	0.32	28.753	73.505	0.179176	0.315556
Parc_hann	0	2.76	2011-07-19	60	27.2375	66.591	0.571148	0.14	27.2396	74.7539	0	0.171111
Parc_hann	0	2.76	2011-08-20	39	29.4011	75.6329	87.9345	0.18	27.5337	74.9163	0	0.166667
Parc_hann	0	2.76	2011-09-17	315	29.9888	81.5346	0	0.2	27.5943	75.4451	0	0.16
Parc_hann	0	2.76	2011-10-19	4474	31.5786	59.4467	0	0.22	27.633	76.4689	0	0.156667
Parc_hann	0	2.76	2011-11-17	369	27.7384	69.9158	0	0.22	27.4072	74.211	0	0.15375
Parc_hann	0	2.76	2011-12-17	58	25.6199	40.6562	0	0.18	26.4678	73.9956	0	0.15
Parc_hann	0	2.76	2012-01-18	80	24.9935	57.9988	0	0.18	25.5137	73.6819	0	0.14625
Parc_hann	0	2.76	2012-02-18	21	19.6563	73.3467	0	0.17	24.7093	77.0382	0	0.14625
Parc_hann	0	2.76	2012-03-17	15	26.7253	42.975	0	0.14	24.1807	77.6108	0	0.14875
Parc_hann	0	2.76	2012-04-18	8	21.4457	73.8133	0	0.14	24.0571	76.8183	0	0.15
Parc_hann	0	2.76	2012-05-16	65	25.659	73.3746	0	0.17	23.9665	74.9029	0	0.14625
Parc_hann	0	2.76	2012-06-18	90	24.237	83.4682	0	0.11	23.9123	74.1946	0	0.14875
Pout	80.03	0	2011-07-24	87	27.9999	56.3921	0	0.36	28.3426	67.6887	0	0.297778
Pout	80.03	0	2011-08-23	282	29.9987	75.6684	0	0.55	28.3905	68.0674	0	0.285556
Pout	80.03	0	2011-09-20	519	29.4697	74.44	3.10281	0.6	28.4443	69.4851	0	0.276667
Pout	80.03	0	2011-10-20	200	29.628	61.9658	0	0.51	28.5094	70.5715	0	0.273333
Pout	80.03	0	2011-11-22	11	27.2677	57.1846	0	0.41	28.7584	68.6026	0	0.264444
Pout	80.03	0	2011-12-21	17	25.9005	36.7508	0	0.34	28.8305	67.4325	0	0.261111
Pout	80.03	0	2012-01-21	5	20.5024	26.2858	0	0.27	28.5136	67.4936	0	0.254444
Pout	80.03	0	2012-02-21	8	25.541	22.3308	0	0.26	28.8189	69.436	0	0.251111
Pout	80.03	0	2012-03-22	5	23.0457	69.1296	0	0.26	29.0267	70.0771	0	0.25
Pout	80.03	0	2012-04-19	20	21.6968	66.0896	0	0.25	29.0424	68.3694	0	0.25125
Pout	80.03	0	2012-05-21	53	29.1052	57.125	0	0.25	28.425	66.9096	0	0.2475
Pout	80.03	0	2012-06-19	25	29.0655	65.3275	0	0.21	27.6085	66.7896	0	0.245
Thies	23.99	0	2011-07-24	74	28.9877	66.6266	0	0.34	28.8293	59.3687	0	0.29375
Thies	23.99	0	2011-08-23	433	29.8928	80.5238	0	0.54	28.8206	59.2232	0	0.27875
Thies	23.99	0	2011-09-21	88	29.9717	74.0417	7.73519	0.57	28.6834	60.9336	0	0.2675
Thies	23.99	0	2011-10-20	55	29.0302	63.0308	0	0.44	28.7798	62.779	0	0.26125
Thies	23.99	0	2011-11-21	9	27.0071	52.7425	0	0.39	29.0551	62.4829	0	0.258889
Thies	23.99	0	2011-12-20	1	24.209	40.8521	0	0.36	29.1596	60.9194	0	0.252222
Thies	23.99	0	2012-01-22	1	20.4345	23.3529	0	0.29	28.9079	60.6235	0	0.252222
Thies	23.99	0	2012-02-21	1	24.8274	28.1938	0	0.24	28.9769	61.7853	0	0.2475
Thies	23.99	0	2012-03-20	5	28.0718	35.1254	0	0.24	29.0736	62.6115	0	0.24875
Thies	23.99	0	2012-04-20	6	23.2933	61.4996	0	0.24	29.1263	61.3663	0	0.25
Thies	23.99	0	2012-05-21	100	29.1161	52.8042	0	0.25	28.5829	60.1326	0	0.245
Thies	23.99	0	2012-06-19	321	28.8981	62.4142	0	0.2	27.9141	60.7558	0	0.24125
