# Supplementary material for: Modelling the Abundances of Two Major Culicoides (Diptera: Ceratopogonidae) Species in the Niayes Area of Senegal
Source: PLoS One. 2015 Jun 29;10(6):e0131021. doi: 10.1371/journal.pone.0131021 (PMC4487250; doi:10.1371/journal.pone.0131021)
Supplement: S2 Data — (XLSX) [file pone.0131021.s002.xlsx]

## Sheet: Feuil1
site	livestock	waterbodies	date	abon_imicola	T_mean	H_mean	prec_mean	ndvi	T.29.24	H.22.6	P.20.8	N.3.0
Mbao	113.58	5.06	2011-07-21	57	24.2388	73.295	0	0.19	26.4691	73.3834	0	0.205
Mbao	113.58	5.06	2011-08-18	32	24.3353	73.185	22.4681	0.23	26.3441	73.4252	0	0.2
Mbao	113.58	5.06	2011-09-17	36	28.9235	72.345	0	0.35	26.1991	73.2079	0	0.1925
Mbao	113.58	5.06	2011-10-19	2225	31.3197	54.9767	0	0.28	25.988	73.0809	0	0.1975
Mbao	113.58	5.06	2011-11-18	1478	26.1527	71.2917	0	0.28	25.8451	72.9794	0	0.1975
Mbao	113.58	5.06	2011-12-18	369	25.5148	33.2817	0	0.28	25.7135	72.8592	0	0.1925
Mbao	113.58	5.06	2012-01-17	84	24.4758	50.8817	0	0.23	25.7211	73.2668	0	0.185
Mbao	113.58	5.06	2012-02-18	244	18.569	76.8783	0	0.23	25.5276	73.5334	0	0.1825
Mbao	113.58	5.06	2012-03-18	50	26.5627	40.005	0	0.2	25.585	74.1629	0	0.185
Mbao	113.58	5.06	2012-04-18	154	20.6533	75.0333	0	0.19	26.1767	74.3592	0	0.1875
Mbao	113.58	5.06	2012-05-18	282	26.8047	72.9733	0.406622	0.19	26.4334	74.4057	0	0.1825
Mbao	113.58	5.06	2012-06-18	62	27.6202	71.5083	0	0.15	26.52	74.2584	0	0.18
Niague	0	10	2011-11-28	779	24.1385	59.6733	0	0.26	28.4369	74.8491	0.2393	0.1625
Niague	0	10	2011-12-18	591	25.4468	36.0317	0	0.23	28.4461	74.6445	0.2393	0.165
Niague	0	10	2012-01-17	106	23.8173	57.7217	0	0.24	28.5451	74.3483	0.2393	0.19
Niague	0	10	2012-02-18	2909	18.6643	78.0117	0	0.17	28.3122	73.9295	0.2393	0.23
Niague	0	10	2012-03-19	234	24.229	59.7746	0	0.18	28.395	73.7508	0	0.2525
Niague	0	10	2012-04-16	588	21.952	71.1592	0	0.19	28.5312	73.3829	0	0.2875
Niague	0	10	2012-05-18	205	25.7719	80.2146	0.546038	0.18	28.8622	73.2144	0	0.3075
Niague	0	10	2012-06-18	520	27.2584	73.9821	0	0.15	28.908	73.0785	0	0.32
Niague	0	10	2012-07-17	334	28.2203	73.4767	0.597004	0.21	29.1526	73.744	0	0.345
Niague	0	10	2012-08-15	49	28.8072	80.1746	1.67208	0.25	29.737	74.0215	0.0413484	0.335
Niague	0	10	2012-09-20	340	29.9193	75.3479	0	0.35	30.0607	74.3104	0.0413484	0.3325
Niague	0	10	2012-10-17	351	30.0659	73.8296	0	0.32	30.4572	75.0779	0.0413484	0.315
Parc_hann	0	2.76	2011-07-19	4	27.2375	66.591	0.571148	0.14	26.4493	74.8834	0	0.1575
Parc_hann	0	2.76	2011-08-18	1	29.3048	74.182	23.1243	0.15	26.4188	74.87	0	0.1525
Parc_hann	0	2.76	2011-09-19	11	30.3116	71.8787	0.651754	0.19	26.3581	74.8305	0	0.14
Parc_hann	0	2.76	2011-10-19	181	31.5786	59.4467	0	0.2	26.212	75.3159	0	0.145
Parc_hann	0	2.76	2011-11-17	50	27.7384	69.9158	0	0.22	26.1516	75.8123	0	0.143333
Parc_hann	0	2.76	2011-12-19	15	25.4871	49.8354	0	0.18	26.1437	76.325	0	0.143333
Parc_hann	0	2.76	2012-01-17	4	25.7256	48.4129	0	0.18	26.0794	76.7145	0	0.146667
Parc_hann	0	2.76	2012-02-18	38	19.6563	73.3467	0	0.17	25.8504	77.0388	0	0.146667
Parc_hann	0	2.76	2012-03-19	5	25.6138	52.2046	0	0.14	25.761	77.9092	0	0.1525
Parc_hann	0	2.76	2012-04-18	4	21.4457	73.8133	0	0.14	26.2393	78.2489	0	0.1575
Parc_hann	0	2.76	2012-05-16	3	25.659	73.3746	0	0.17	26.461	78.4898	0	0.1525
Parc_hann	0	2.76	2012-06-16	3	26.0998	83.5575	0	0.11	26.4887	78.5744	0	0.145
Pout	80.03	0	2011-07-24	9	27.9999	56.3921	0	0.36	27.902	67.9094	0	0.27
Pout	80.03	0	2011-08-23	104	29.9987	75.6684	0	0.55	27.6507	67.9655	0	0.2575
Pout	80.03	0	2011-09-21	153	31.1053	70.9667	7.73519	0.54	27.4118	67.9097	0	0.2525
Pout	80.03	0	2011-10-20	107	30.9325	49.2825	0	0.51	27.1645	67.9856	0	0.2575
Pout	80.03	0	2011-11-20	7	26.552	59.9808	0	0.44	27.1555	68.0404	0	0.2575
Pout	80.03	0	2011-12-21	23	25.9005	36.7508	0	0.34	27.1167	67.9834	0	0.2575
Pout	80.03	0	2012-01-22	83	20.9668	29.2092	0	0.27	26.801	67.6092	0	0.25
Pout	80.03	0	2012-02-21	52	24.7913	38.67	0	0.26	26.5189	67.2438	0	0.2425
Pout	80.03	0	2012-03-22	7	22.4964	66.5721	0	0.26	26.3958	67.4087	0	0.24
Pout	80.03	0	2012-04-19	23	21.6968	66.0896	0	0.25	26.9333	68.3136	0	0.246667
Pout	80.03	0	2012-05-21	27	29.1052	57.125	0	0.25	27.1853	68.2127	0	0.24
Pout	80.03	0	2012-06-19	55	29.0655	65.3275	0	0.21	27.2128	68.0769	0	0.236667
Thies	23.99	0	2011-07-24	120	28.9877	66.6266	0	0.34	28.4521	60.8186	0	0.2625
Thies	23.99	0	2011-08-23	135	29.8928	80.5238	0	0.54	28.3407	61.2127	0	0.255
Thies	23.99	0	2011-09-21	307	29.9717	74.0417	7.73519	0.57	28.2187	61.2565	0	0.245
Thies	23.99	0	2011-10-20	32	28.6253	52.9867	0	0.44	27.8696	61.495	0	0.25
Thies	23.99	0	2011-11-21	39	27.0071	52.7425	0	0.39	27.8137	61.7473	0	0.2475
Thies	23.99	0	2011-12-20	25	24.209	40.8521	0	0.36	27.8541	61.9639	0	0.245
Thies	23.99	0	2012-01-22	22	20.4345	23.3529	0	0.29	27.7398	61.8377	0	0.25
Thies	23.99	0	2012-02-21	18	24.8274	28.1938	0	0.24	27.4487	61.6571	0	0.246667
Thies	23.99	0	2012-03-22	8	22.6341	60.4846	0	0.25	27.299	61.7536	0	0.25
Thies	23.99	0	2012-04-19	23	21.9342	61.7096	0	0.24	27.7267	62.8559	0	0.26
Thies	23.99	0	2012-05-21	27	29.1161	52.8042	0	0.25	28.012	62.8962	0	0.236667
Thies	23.99	0	2012-06-19	100	28.8981	62.4142	0	0.2	28.0439	62.8587	0	0.2325
